# Supplementary material for: Cases of Lightning Strikes during Mountain-Sports Activities: An Analysis of Emergencies from the Swiss Alps
Source: MDPI journal article supplement (doi:10.3390/ijerph19073954), 2022-03-26
Supplement: s1 [file s1]

**Supplementary Table S1.** Description of National Advisory Committee for Aeronautics Score (NACA-Score) [23,24].

|          |                                                                                                                                                                                                                                                       |
|----------|-------------------------------------------------------------------------------------------------------------------------------------------------------------------------------------------------------------------------------------------------------|
| NACA 0   | No injury or disease.                                                                                                                                                                                                                                 |
| NACA I   | Minor disturbance. No medical intervention is required (e.g., slight abrasion).                                                                                                                                                                       |
| NACA II  | Slight to moderate disturbance. Outpatient medical investigation but usually no emergency medical measures necessary (e.g., fracture of a finger bone, moderate cuts, dehydration).                                                                   |
| NACA III | Moderate to severe but not life-threatening disorder. Stationary treatment required, often emergency medical measures on the site (e.g., femur fracture, milder stroke, smoke inhalation).                                                            |
| NACA IV  | Serious incident where rapid development into a life-threatening condition cannot be excluded. In the majority of cases, emergency medical care is required (e.g., vertebral injury with neurological deficit, severe asthma attack, drug poisoning). |
| NACA V   | Acute danger (e.g., third grade skull or brain trauma or severe heart attack).                                                                                                                                                                        |
| NACA VI  | Respiratory and or cardiac arrest.                                                                                                                                                                                                                    |
| NACA VII | Death.                                                                                                                                                                                                                                                |
